# Supplementary material for: Machine learning-based derivation and validation of three immune phenotypes for risk stratification and prognosis in community-acquired pneumonia: a retrospective cohort study
Source: Front Immunol. 2024 Jul 24;15:1441838. doi: 10.3389/fimmu.2024.1441838 (PMC11303239; doi:10.3389/fimmu.2024.1441838)
Supplement: Supplementary Table 2 — Characteristics and outcomes of patients divided by immune phenotypes in meta cohort. [file Table_2.xlsx]

## Sheet: Sheet1
Meta
Phenotype	Phenotype A(n=485)	Phenotype B(n=465)	Phenotype C(n=206)	Total(n=1156)	P value
Demographics
Sex, n (%)					0
Female	257 (53%)	178 (38%)	57 (28%)	492 (43%)
Male	228 (47%)	287 (62%)	149 (72%)	664 (57%)
Age (years), median (IQR)	60 [40; 68]	68 [61; 75]	70 [63; 79]	65 [54; 73]	0
Height (cm), median (IQR)	165 [160; 172]	167 [160; 172]	170 [160; 175]	166 [160; 172]	0.009
Weight (kg), median (IQR)	64 [56; 73]	65 [57; 72]	65 [56; 76]	64 [56; 73]	0.585
Mentation, n (%)					0.29
1	485(41.96%)	455(39.36%)	201(17.39%)	1141(98.70%)
2	0(0%)	3(0.26%)	1(0.09%)	4(0.35%)
3	0(0%)	3(0.26%)	2(0.17%)	5(0.43%)
4	0(0%)	1(0.09%)	1(0.09%)	2(0.17%)
5	0(0%)	1(0.09%)	0(0%)	1(0.09%)
6	0(0%)	0(0%)	0(0%)	0(0%)
7	0(0%)	1(0.09%)	1(0.09%)	2(0.17%)
8	0(0%)	1(0.09%)	0(0%)	1(0.09%)
Vital signs
Fever peak, median (IQR)	38 [37; 39]	38 [37; 39]	38 [38; 39]	38 [37; 39]	0
Temperature admission , median (IQR)	37 [36; 37]	37 [37; 38]	37 [37; 38]	37 [37; 38]	0
Tmax during the course, median (IQR)	37 [37; 38]	37 [37; 38]	38 [37; 39]	37 [37; 38]	0
Heart rate, median (IQR)	92 [82; 100]	92 [82; 101]	92 [84; 103]	92 [83; 101]	0.3
Respiration Rate, median (IQR)	20 [18; 20]	20 [19; 20]	20 [18; 21]	20 [18; 20]	0.001
Systolic blood pressure, median (IQR)	131 [120; 145]	133 [122; 150]	134 [119; 153]	132 [120; 149]	0.061
Diastolic blood pressure, median (IQR)	80 [72; 88]	78 [70; 86]	78 [70; 87]	79 [71; 87]	0.02
CURB-65 score, n (%)
0	268 (55%)	144 (31%)	40 (19%)	452 (39%)
1	177 (36%)	187 (40%)	80 (39%)	444 (38%)
2	37 (8%)	114 (25%)	71 (34%)	222 (19%)
3	3 (1%)	20 (4%)	14 (7%)	37 (3%)
4	0 (0.0%)	0 (0.0%)	1 (0%)	1 (0%)
5	0 (0.0%)	0 (0.0%)	0 (0.0%)	0 (0.0%)
PSI score, median (IQR)	57 [39; 72]	75 [60; 94]	89 [74; 109]	70 [53; 89]	0
Chief Complaint
Cough, n (%)					0.003
No	93 (19%)	121 (26%)	62 (30%)	276 (24%)
Yes	392 (81%)	344 (74%)	144 (70%)	880 (76%)
Sputum, n (%)					0.236
No	221 (46%)	227 (49%)	108 (52%)	556 (48%)
Yes	264 (54%)	238 (51%)	98 (48%)	600 (52%)
Chest Pain, n (%)					0.149
No	447 (92%)	436 (94%)	198 (96%)	1081 (94%)
Yes	38 (8%)	29 (6%)	8 (4%)	75 (6%)
Dyspnea, n (%)					0
No	405 (84%)	334 (72%)	135 (66%)	874 (76%)
Yes	80 (16%)	131 (28%)	71 (34%)	282 (24%)
Chest Tightness, n (%)					0.235
No	439 (91%)	407 (88%)	179 (87%)	1025 (89%)
Yes	46 (9%)	58 (12%)	27 (13%)	131 (11%)
Fever, n (%)					0.007
No	248 (51%)	200 (43%)	82 (40%)	530 (46%)
Yes	237 (49%)	265 (57%)	124 (60%)	626 (54%)
Fatigue, n (%)					0.007
No	474 (98%)	447 (96%)	191 (93%)	1112 (96%)
Yes	11 (2%)	18 (4%)	15 (7%)	44 (4%)
Consciousness Disorder, n (%)					0.022
No	485 (100%)	459 (99%)	205 (100%)	1149 (99%)
Yes	0 (0.0%)	6 (1%)	1 (0%)	7 (1%)
Difficulty Breathing, n (%)					0
No	482 (99%)	453 (97%)	193 (94%)	1128 (98%)
Yes	3 (1%)	12 (3%)	13 (6%)	28 (2%)
Hemoptysis, n (%)					0.357
No	462 (95%)	451 (97%)	199 (97%)	1112 (96%)
Yes	23 (5%)	14 (3%)	7 (3%)	44 (4%)
Comorbidity
Respiratory system
COPD, n (%)					0.003
No	441 (91%)	389 (84%)	177 (86%)	1007 (87%)
Yes	44 (9%)	76 (16%)	29 (14%)	149 (13%)
Bronchiectasis, n (%)					0.926
No	455 (94%)	439 (94%)	194 (94%)	1088 (94%)
Yes	30 (6%)	26 (6%)	12 (6%)	68 (6%)
Emphysema bullae, n (%)					0.257
No	469 (97%)	442 (95%)	194 (94%)	1105 (96%)
Yes	16 (3%)	23 (5%)	12 (6%)	51 (4%)
Pulmonary hypertension, n (%)					0.007
No	480 (99%)	445 (96%)	201 (98%)	1126 (97%)
Yes	5 (1%)	20 (4%)	5 (2%)	30 (3%)
Lung cancer, n (%)					0.007
No	470 (97%)	439 (94%)	188 (91%)	1097 (95%)
Yes	15 (3%)	26 (6%)	18 (9%)	59 (5%)
PE, n (%)					0.032
No	476 (98%)	445 (96%)	195 (95%)	1116 (97%)
Yes	9 (2%)	20 (4%)	11 (5%)	40 (3%)
Asthma, n (%)					0.968
No	465 (96%)	445 (96%)	198 (96%)	1108 (96%)
Yes	20 (4%)	20 (4%)	8 (4%)	48 (4%)
OSAHS, n (%)					0.7
No	468 (96%)	446 (96%)	196 (95%)	1110 (96%)
Yes	17 (4%)	19 (4%)	10 (5%)	46 (4%)
Bronchitis, n (%)					0.414
No	479 (99%)	454 (98%)	203 (99%)	1136 (98%)
Yes	6 (1%)	11 (2%)	3 (1%)	20 (2%)
Cardiovascular system
Hypertension, n (%)					0
No	322 (66%)	260 (56%)	107 (52%)	689 (60%)
Yes	163 (34%)	205 (44%)	99 (48%)	467 (40%)
Atrial fibrillation, n (%)					0
No	472 (97%)	432 (93%)	182 (88%)	1086 (94%)
Yes	13 (3%)	33 (7%)	24 (12%)	70 (6%)
Coronary heart disease, n (%)					0.018
No	444 (92%)	408 (88%)	174 (84%)	1026 (89%)
Yes	41 (8%)	57 (12%)	32 (16%)	130 (11%)
Arrhythmia, n (%)					0
No	446 (92%)	395 (85%)	164 (80%)	1005 (87%)
Yes	39 (8%)	70 (15%)	42 (20%)	151 (13%)
Heart failure, n (%)					0
No	465 (96%)	390 (84%)	139 (67%)	994 (86%)
Yes	20 (4%)	75 (16%)	67 (33%)	162 (14%)
Digestive system
Liver dysfunction, n (%)					0
No	439 (91%)	391 (84%)	162 (79%)	992 (86%)
Yes	46 (9%)	74 (16%)	44 (21%)	164 (14%)
Gastric cancer, n (%)					0.206
No	482 (99%)	462 (99%)	202 (98%)	1146 (99%)
Yes	3 (1%)	3 (1%)	4 (2%)	10 (1%)
Colorectal cancer, n (%)					0.046
No	481 (99%)	458 (98%)	199 (97%)	1138 (98%)
Yes	4 (1%)	7 (2%)	7 (3%)	18 (2%)
Esophageal cancer, n (%)					0.507
No	484 (100%)	462 (99%)	205 (100%)	1151 (100%)
Yes	1 (0%)	3 (1%)	1 (0%)	5 (0%)
Hepatitis, n (%)					0.215
No	484 (100%)	461 (99%)	206 (100%)	1151 (100%)
Yes	1 (0%)	4 (1%)	0 (0.0%)	5 (0%)
Urinary system
Renal Insufficiency, n (%)					0
No	474 (98%)	427 (92%)	175 (85%)	1076 (93%)
Yes	11 (2%)	38 (8%)	31 (15%)	80 (7%)
Urological tumors, n (%)					0.053
No	482 (99%)	459 (99%)	200 (97%)	1141 (99%)
Yes	3 (1%)	6 (1%)	6 (3%)	15 (1%)
Kidney Stones, n (%)					0.16
No	467 (96%)	457 (98%)	201 (98%)	1125 (97%)
Yes	18 (4%)	8 (2%)	5 (2%)	31 (3%)
Endocrine system
Diabetes, n (%)					0.002
No	403 (83%)	352 (76%)	149 (72%)	904 (78%)
Yes	82 (17%)	113 (24%)	57 (28%)	252 (22%)
Nervous system
Senile dementia, n (%)					0.015
No	484 (100%)	462 (99%)	201 (98%)	1147 (99%)
Yes	1 (0%)	3 (1%)	5 (2%)	9 (1%)
Cerebral infarction, n (%)					0
No	459 (95%)	421 (91%)	176 (85%)	1056 (91%)
Yes	26 (5%)	44 (9%)	30 (15%)	100 (9%)
PD, n (%)					0.029
No	484 (100%)	458 (98%)	202 (98%)	1144 (99%)
Yes	1 (0%)	7 (2%)	4 (2%)	12 (1%)
History of mlignancy, n (%)					0
No	457 (94%)	414 (89%)	172 (83%)	1043 (90%)
Yes	28 (6%)	51 (11%)	34 (17%)	113 (10%)
Full Blood Count
Hemoglobin (g/L), median (IQR)	127 [118; 138]	124 [114; 135]	116 [104; 129]	125 [113; 135]	0
Neutrophil percent (%) , median (IQR)	60 [53; 68]	75 [66; 83]	81 [72; 89]	69 [59; 81]	0
Neutrophil count (*10^9/L), median (IQR)	4 [3; 5]	5 [3; 7]	7 [4; 10]	4 [3; 7]	0
MCV (fl), median (IQR)	90 [88; 94]	91 [89; 95]	91 [88; 94]	91 [88; 94]	0.035
MCH (pg), median (IQR)	30 [29; 31]	30 [29; 32]	30 [29; 32]	30 [29; 31]	0.125
MCHC (g/L), median (IQR)	332 [326; 340]	333 [325; 341]	333 [326; 341]	333 [325; 340]	0.537
MPV (fl), median (IQR)	9 [9; 10]	9 [9; 10]	9 [9; 10]	9 [9; 10]	0.056
WBC Count (*10^9/L), median (IQR)	6 [5; 8]	6 [5; 9]	8 [6; 12]	7 [5; 9]	0
Lymphocyte percent (%), median (IQR)	29 [22; 36]	16 [10; 22]	10 [6; 17]	20 [12; 30]	0
Lymphocyte count (*10^9/L), median (IQR)	2 [2; 2]	1 [1; 1]	1 [1; 1]	1 [1; 2]	0
Eosinophil percent (%), median (IQR)	2 [1; 3]	1 [0; 2]	1 [0; 2]	2 [0; 3]	0
Monocyte percent (%), median (IQR)	7 [6; 8]	7 [5; 9]	6 [4; 8]	7 [5; 9]	0.001
Monocyte count (*10^9/L), median (IQR)	0 [0; 1]	0 [0; 1]	0 [0; 1]	0 [0; 1]	0.303
RDW (%), median (IQR)	13 [12; 13]	13 [12; 14]	13 [13; 14]	13 [12; 14]	0
Arterial Blood Gas
HCO3 (mmol/L), median (IQR)	25 [24; 27]	26 [23; 28]	24 [21; 27]	25 [23; 27]	0
HCO3std (mmol/L), median (IQR)	25 [24; 26]	26 [24; 27]	25 [23; 27]	25 [24; 27]	0.004
pCO2 (kPa), median (IQR)	5 [5; 6]	5 [5; 6]	5 [4; 5]	5 [5; 6]	0
pH, median (IQR)	7 [7; 7]	7 [7; 7]	7 [7; 7]	7 [7; 7]	0
pO2 (kPa), median (IQR)	12 [10; 14]	12 [10; 15]	12 [10; 15]	12 [10; 15]	0.207
TCO2 (mmol/L), median (IQR)	50 [47; 54]	50 [45; 56]	48 [41; 55]	50 [45; 54]	0.002
Glu	5 [5; 6]	6 [5; 7]	6 [5; 8]	5 [5; 7]	0
Renal Function
Cr (umol/L), median (IQR)	57 [49; 69]	60 [51; 74]	66 [55; 87]	60 [51; 73]	0
BUN (mmol/L), median (IQR)	5 [4; 6]	5 [4; 7]	7 [5; 10]	5 [4; 7]	0
GFR (mL/min per1.75m^2), median (IQR)	108 [93; 127]	104 [83; 123]	95 [73; 124]	105 [85; 125]	0
UA (umol/L), median (IQR)	280 [230; 344]	256 [204; 324]	268 [189; 345]	269 [213; 338]	0
ACE (U/L), median (IQR)	24 [18; 31]	22 [16; 30]	23 [17; 30]	24 [17; 30]	0.055
Blood lipids
LDL-C (mmol/L), median (IQR)	3 [2; 3]	2 [2; 3]	2 [1; 3]	2 [2; 3]	0
TG (mmol/L), median (IQR)	1 [1; 2]	1 [1; 1]	1 [1; 1]	1 [1; 1]	0.003
ApoE (mg/dL), median (IQR)	4 [3; 5]	3 [3; 5]	4 [3; 5]	4 [3; 5]	0.214
Coagulation
D-Dimer (mg/L), median (IQR)	0 [0; 1]	1 [0; 1]	1 [1; 2]	1 [0; 1]	0
TT (s), median (IQR)	14 [13; 15]	14 [13; 15]	14 [13; 15]	14 [13; 15]	0.035
APTT (s), median (IQR)	12 [11; 12]	12 [11; 13]	13 [12; 14]	12 [11; 13]	0
INR, median (IQR)	1 [1; 1]	1 [1; 1]	1 [1; 1]	1 [1; 1]	0
PTT (s), median (IQR)	31 [29; 34]	30 [28; 33]	31 [28; 34]	31 [28; 33]	0.008
ATA (%), median (IQR)	88 [78; 97]	82 [70; 91]	74 [65; 85]	83 [72; 93]	0
Inflammatory Cytokine
IL-10 (pg/mL), median (IQR)	5 [5; 5]	5 [5; 5]	5 [5; 8]	5 [5; 5]	0
IL-1B (pg/mL), median (IQR)	5 [5; 7]	5 [5; 10]	7 [5; 15]	5 [5; 10]	0
IL-2R (U/mL), median (IQR)	443 [333; 592]	595 [454; 787]	1415 [1183;1856]	574 [409; 881]	0
IL-6 (pg/mL), median (IQR)	4 [3; 10]	9 [4; 21]	20 [7; 48]	7 [3; 19]	0
IL-8 (pg/mL), median (IQR)	24 [12; 70]	25 [15; 52]	40 [20; 72]	26 [15; 62]	0
TNF-α (pg/mL), median (IQR)	14 [8; 30]	14 [9; 28]	19 [12; 29]	15 [9; 29]	0
IgG4 (g/L), median (IQR)	1 [0; 1]	0 [0; 1]	0 [0; 1]	0 [0; 1]	0.057
Electrolytes
P (mmol/L), median (IQR)	1 [1; 1]	1 [1; 1]	1 [1; 1]	1 [1; 1]	0
Cl (mmol/L), median (IQR)	105 [103; 107]	104 [101; 107]	103 [101; 107]	105 [102; 107]	0
Mg (mmol/L), median (IQR)	1 [1; 1]	1 [1; 1]	1 [1; 1]	1 [1; 1]	0.007
Potassium (mmol/L), median (IQR)	4 [4; 4]	4 [4; 4]	4 [4; 4]	4 [4; 4]	0.314
Ca (mmol/L), median (IQR)	2 [2; 2]	2 [2; 2]	2 [2; 2]	2 [2; 2]	0
Sodium (mmol/L), median (IQR)	140 [138; 142]	139 [136; 141]	137 [132; 140]	139 [136; 141]	0
Inflammation Measurements
CRP (mg/L), median (IQR)	8 [2; 36]	32 [6; 76]	98 [33; 160]	24 [4; 76]	0
PCT (ng/mL), median (IQR)	0 [0; 0]	0 [0; 0]	0 [0; 1]	0 [0; 0]	0
ESR (mm/h), median (IQR)	31 [16; 56]	45 [23; 70]	65 [36; 90]	42 [21; 70]	0
Myocardial Enzyme
CK-MB (U/L), median (IQR)	4 [3; 7]	5 [4; 8]	6 [4; 8]	5 [3; 7]	0
cTnI (ng/ml), median (IQR)	0 [0; 0]	0 [0; 0]	0 [0; 0]	0 [0; 0]	0
CK (U/L), median (IQR)	62 [42; 91]	65 [41; 106]	60 [35; 129]	63 [41; 100]	0.765
α-HBDH (U/L), median (IQR)	127 [106; 152]	149 [118; 180]	172 [133; 240]	142 [114; 173]	0
LDH (U/L), median (IQR)	193 [163; 220]	220 [187; 264]	285 [208; 355]	212 [176; 264]	0
Cell immunity
CD3T (%), median (IQR)	74 [69; 79]	67 [58; 74]	69 [59; 76]	70 [63; 77]	0
CD4T (%), median (IQR)	45±9	39±11	40±12	42±11	0
CD8T (%), median (IQR)	25 [20; 31]	24 [18; 30]	23 [16; 32]	24 [18; 31]	0.006
CD3T (Cells/uL), median (IQR)	1336 [1128;1618]	667 [450; 851]	516 [338; 853]	932 [567;1285]	0
CD4T (Cells/uL), median (IQR)	811 [671; 995]	388 [256; 503]	298 [203; 501]	532 [320; 786]	0
CD64 infection index	1 [0; 1]	1 [0; 2]	2 [1; 6]	1 [0; 2]	0
CD8T (Cells/uL), median (IQR)	458 [359; 587]	218 [151; 316]	184 [103; 317]	314 [186; 461]	0
Humoral Immunity
Ig A (g/L), median (IQR)	2 [2; 3]	3 [2; 3]	2 [2; 4]	2 [2; 3]	0.731
Ig E (IU/mL), median (IQR)	51 [18; 186]	59 [21; 154]	126 [28; 652]	59 [22; 198]	0
Ig G (g/L), median (IQR)	12 [11; 14]	12 [10; 14]	12 [10; 15]	12 [10; 14]	0.109
Ig M (g/L), median (IQR)	1 [1; 1]	1 [1; 1]	1 [0; 1]	1 [1; 1]	0
Liver Function
GGT (U/L), median (IQR)	26 [16; 46]	29 [19; 52]	38 [25; 74]	29 [18; 53]	0
Alb (g/L), Mean±SD	38±4	35±5	30±5	35±5	0
AST (U/L), median (IQR)	18 [12; 31]	21 [13; 33]	26 [16; 43]	20 [13; 34]	0
ALT (U/L), median (IQR)	18 [15; 25]	21 [17; 31]	28 [20; 46]	21 [16; 31]	0
ALP (U/L), median (IQR)	73 [59; 90]	74 [61; 92]	86 [68; 123]	75 [61; 95]	0
PA (mg/L), median (IQR)	188 [144; 230]	147 [107; 196]	102 [71; 146]	158 [111; 206]	0
TB (umol/L), median (IQR)	8 [6; 11]	9 [7; 12]	9 [7; 13]	9 [6; 11]	0.001
TP (g/L), median (IQR)	66 [63; 70]	62 [58; 67]	61 [55; 65]	64 [60; 68]	0
FIB (g/L), median (IQR)	4 [3; 5]	4 [3; 5]	5 [4; 5]	4 [3; 5]	0
Complement system
C3 (g/L), median (IQR)	1 [1; 1]	1 [1; 1]	1 [1; 1]	1 [1; 1]	0.076
C4 (g/L), median (IQR)	0 [0; 0]	0 [0; 0]	0 [0; 0]	0 [0; 0]	0.451
CH50 (U/mL), Mean±SD	51±15	49±15	48±17	50±15	0.129
Respiratory support
HFNC, n (%)					0
No	482 (99%)	447 (96%)	181 (88%)	1110 (96%)
Yes	3 (1%)	18 (4%)	25 (12%)	46 (4%)
NIMV, n (%)					0
No	476 (98%)	410 (88%)	174 (84%)	1060 (92%)
Yes	9 (2%)	55 (12%)	32 (16%)	96 (8%)
IMV, n (%)					0.586
No	483 (100%)	461 (99%)	204 (99%)	1148 (99%)
Yes	2 (0%)	4 (1%)	2 (1%)	8 (1%)
Clinical Outcomes
ICU duration (days), median (IQR)	0 [0; 0]	0 [0; 7]	0 [0; 17]	0 [0; 0]	0
Ventilation duration (days), median (IQR)	0 [0; 0]	0 [0; 0]	0 [0; 3]	0 [0; 0]	0
Length of stay, median (IQR)	8 [7; 10]	10 [8; 15]	13 [9; 20]	9 [7; 14]	0
Inpatient Outcome, n (%)					0
Alive	485 (100%)	445 (96%)	173 (84%)	1103 (95%)
Dead	0 (0.0%)	20 (4%)	33 (16%)	53 (5%)
ICU free days (days), median (IQR)	8 [6; 10]	8 [1; 12]	6 [0; 11]	8 [4; 11]	0.004
Outcome at 28 days, n (%)					0
Alive	485 (100%)	452 (97%)	180 (87%)	1117 (97%)
Dead	0 (0.0%)	13 (3%)	26 (13%)	39 (3%)
Days from symptom onset (days), median (IQR)	10 [7; 14]	9 [5; 14]	9 [5; 14]	10 [6; 14]	0.03
ICU admission, n (%)					0
No	450 (93%)	346 (74%)	121 (59%)	917 (79%)
Yes	35 (7%)	119 (26%)	85 (41%)	239 (21%)
